# Supplementary material
Source: HighWire-hosted journal article supplement (https://bmjopen.bmj.com/content/7/10/e017661)
Supplement: inline-supplementary-material-1 [file inline-supplementary-material-1.pdf]

Patient demographics

1. BFAT ID Code (e.g HOSP\_0001)

2. Age:

Age in years

3. Sex:

☐

Male

☐

Female

4. Marital Status

☐

Single

☐

Married

☐

De facto

☐

Widowed

☐

Divorced

☐

Unknown

5. Aboriginal or Torres Strait Islander

☐

Yes

☐

No

☐

Unknown

6. NESB

☐

Yes

☐

No

☐

Unknown

7. Date and time of final admission

|      | DD                   | MM                   | YYYY                 | HH                   | MM                   | AM/PM                |
|------|----------------------|----------------------|----------------------|----------------------|----------------------|----------------------|
| Date | <input type="text"/> |

8. Cause of death/diagnosis at death

Admissions History

## Brisbane Futility Audit Tool\_5February15

### 9. Date and time of death

Date 

| DD                   | MM                   | YYYY                 | HH                   | MM                   | AM/PM                |
|----------------------|----------------------|----------------------|----------------------|----------------------|----------------------|
| <input type="text"/> |

### 10. Medical Unit of Death (specialty not ward)

### 11. Interregional transfer?

☐ Yes

☐ No

If yes, please specify referring hospital

### 12. Previous admissions over past 3 years

Number:

### 13. Admitted to ICU in final admission

☐ Yes

☐ No

### 14. Start and end times for ICU admissions during final admission

First Admission 

| DD                   | MM                   | YYYY                 | HH                   | MM                   | AM/PM                |
|----------------------|----------------------|----------------------|----------------------|----------------------|----------------------|
| <input type="text"/> |

Start Date and  
Time:

End Date and 

| DD                   | MM                   | YYYY                 | HH                   | MM                   | AM/PM                |
|----------------------|----------------------|----------------------|----------------------|----------------------|----------------------|
| <input type="text"/> |

Time:

Second 

| DD                   | MM                   | YYYY                 | HH                   | MM                   | AM/PM                |
|----------------------|----------------------|----------------------|----------------------|----------------------|----------------------|
| <input type="text"/> |

Admission Start  
Date and Time:

End Date and 

| DD                   | MM                   | YYYY                 | HH                   | MM                   | AM/PM                |
|----------------------|----------------------|----------------------|----------------------|----------------------|----------------------|
| <input type="text"/> |

Time:

## Social Premorbid History

### 15. Activities of Daily Living

☐ Independent

☐ Partially dependant

☐ Dependant

☐ Unknown

## Brisbane Futility Audit Tool\_5February15

### 16. Care needs (if specified)

- ☐ Nil
- ☐ Has a carer
- ☐ Home visit nurse
- ☐ Resident in Aged Care Facility
- ☐ Unknown

### 17. Is a carer?

- ☐ Yes
- ☐ No
- ☐ Unknown

### 18. Exercise tolerance

- ☐ No limits on physical activity
- ☐ Ordinary activities result in fatigue/symptoms
- ☐ Less than ordinary activities result in fatigue/symptoms
- ☐ Bed bound
- ☐ Unknown

### 19. Alcohol Use

- ☐ Yes
- ☐ No
- ☐ Unknown

Number of standard drinks per week

### 20. Smoker

- ☐ Yes
- ☐ No
- ☐ Unknown

Packs per day

## Brisbane Futility Audit Tool\_5February15

### 21. Other drug use

- ☐ Yes  
☐ No  
☐ Unknown

Give details here

### 22. Evidence of Advance Care Planning prior to admission

- ☐ Yes  
☐ No

### 23. If yes, tick the boxes below

- ☐ Palliative Care Review  
☐ Refusal of treatment  
☐ AHD  
☐ EPA  
☐ NFR  
☐ ARP  
☐ Notes in chart regarding wishes (give details on Summary page)

AHD – Advance Health Directive  
EPA – Enduring Power of Attorney  
NFR – Not For Resuscitation  
ARP – Acute Resuscitation Plan

### 24. Family, partner and personal support group

- ☐ Spouse or partner  
☐ Sibling/s  
☐ Adult children  
☐ Parent  
☐ Attorney or Guardian appointed  
☐ Other (e.g friend, neighbour, nephew, niece)  
☐ None

### 25. Conflict in medical team?

- ☐ Yes  
☐ No

### 26. Family conflict

- ☐ Yes  
☐ No

## Brisbane Futility Audit Tool\_5February15

### 27. Briefly note the nature of the conflict here

### 28. Other external review

- ☐ Hospital lawyer
- ☐ Hospital administrator
- ☐ Ethics committee
- ☐ Adult Guardian
- ☐ Court or Tribunal
- ☐ Coronial review

Other (please specify)

## Clinical Premorbid History incorporating SPICT criteria

### 29. Identify any of the following indicators of deteriorating health

- ☐ Needs help with personal care, in bed or chair for 50% or more per day
- ☐ Two or more unplanned hospital admissions in the past 6 months
- ☐ Weight loss (5-10%) over the past 3-6 months and/or body mass index <20
- ☐ Persistent, troublesome symptoms despite optimal treatment of any underlying condition(s).
- ☐ At risk of dying from a sudden, acute deterioration.
- ☐ Patient requests supportive and palliative care, or treatment withdrawal.
- ☐ Would be surprised if this patient is alive in 12 months?
- ☐ Have clinicians indicated this is futile?

### 30. Consult attached SPICT Criteria code and tick the symptoms that apply

Number of criteria ticked:

Insert codes here:

### 31. Major procedures in the last 12 months (including CPR) (e.g surgery, GA, initiate dialysis, chemotherapy or radiotherapy)

### 32. Documented benefit of treatment in the last 2 weeks

## Brisbane Futility Audit Tool\_5February15

### 33. Documented burden of treatments delivered in the last 2 weeks

### 34. Use of evidence based protocols in the last 2 weeks

### 35. Resuscitation Status for final admission

#### Patient requests:

- ☐ Defibrillation
- ☐ Invasive ventilation
- ☐ Active treatment

*Active treatment is defined as a therapeutic substance or course intended to ameliorate the basic disease problem, as opposed to supportive or palliative treatment*

### 36. Outcome of resuscitation at or during admission

- ☐ Improvement
- ☐ No change
- ☐ Deterioration

Other (please specify)

### 37. Suitable for organ donation

- ☐ Yes
- ☐ No

### 38. Decision to donate

- ☐ Yes
- ☐ No

## Review all sections

### 39. Date patient or family request withdrawal or limitation of therapy

Date / Time  /  /

### 40. Date that medical team suggest withdrawal or limitation of therapy

Date / Time  /  /

### 41. If treatment continues after these dates, record reason here

## Brisbane Futility Audit Tool\_5February15

**42. Was there a documented decision not to treat or to withdraw treatment during this admission?**

- ☐ Yes  
☐ No

**43. On what date was treatment withdrawn?**

Date / Time      DD    MM    YYYY  
                     /  /

**44. Was there futile treatment for this patient? Use this definition as a guide and tick elements that appear to be relevant for this case.**

**Futile treatment is treatment that does not bring benefit to the patient, in terms of:**

- ☐ Improving the patient's quality of life  
☐ Significantly prolonging the patient's life of acceptable quality  
☐ Involving burden that outweighs benefit

**45. Was there futile treatment for this patient?**

- ☐ YES  
☐ NO

**46. How confident are you in your answer?**

- ☐ 0-10%    ☐ 11-20%    ☐ 21-30%    ☐ 31-40%    ☐ 41-50%    ☐ 51-60%    ☐ 61-70%    ☐ 71-80%    ☐ 81-90%    ☐ 91-100%

**47. If YES, on what date did care become futile?**

**Please do not skip this question, your best response is very important**

Date care became futile:      DD    MM    YYYY  
                                           /  /
