# Supplementary material
Source: HighWire-hosted journal article supplement (https://bmjopen.bmj.com/content/7/10/e017661)
Supplement: inline-supplementary-material-2 [file inline-supplementary-material-2.pdf]

# Brisbane Futility Chart Audit

Case ID:

Reviewer ID:

## Definition of futile treatment for this audit:

Treatment that brings only a very low chance of meaningful benefit to the patient, in terms of:

- improving the patient's quality of life;
- sufficiently prolonging the patient's life of acceptable quality and/or
- bringing benefits that outweigh burdens of treatment

Did this patient receive futile care? (Tick one)

☐ YES

☐ NO

If YES, when do you think  
treatment became futile?

..... / ..... / 2012

If futile, please tick below to indicate if any of the following factors contributed to the futile treatment being provided (tick as many as apply):

| Reason                                                       | Tick |
|--------------------------------------------------------------|------|
| Prognostic uncertainty                                       |      |
| Futile transfer                                              |      |
| Doctors kept offering treatment                              |      |
| Patient's overall state of ill-health not taken into account |      |
| No clear overall treatment goal/plan for this patient        |      |
| Patient or family requested continuation of active treatment |      |
| Conflict within family                                       |      |
| Difference of opinion between teams/clinicians               |      |
| Communication issues (please specify below):                 |      |
| Other reason/s (please print):                               |      |

Any other comments about the review procedure or process:

.....

.....
